# Supplementary material for: A planarian p53 homolog regulates proliferation and self-renewal in adult stem cell lineages
Source: Oxford University Press journal article supplement (doi:10.1242/dev.044297), 2009-12-29
Supplement: dev044297-sup-044297-figs2.pdf [file dev044297-sup-044297-figs2.pdf]

Hs p53 1 MEEPQSDPSVEPPLSQETFSDLWKLLENVLSPLPSQAMDDLMLSPDDIEQWFTEDPGPDEAPRMPEAAPRVAPAAPTPAAPAPAPSWPLSS-SVPSQKTYQGSYGFRLGFLHSGT --- 118  
Dl p53 1 MEESQAE LGVEPPLSQETFSDLWKLLENVLSLSELSPAVDDL L LSPEDVANWLDERP--DEAPQMPEPP-----APAAPTPAAPAPATSWPLSS-FVPSQKTYPGSYGFHLGFLHSGT --- 111  
Gg p53 1 ---MAEEMEPLLEPTEVFMDLWSMLPYS-----MQQLPLPEDHSNWQELSPLEPSDPPPPPPPPPLPLAAAAPPLNPPTPPRAAPSP-VVPSTEDYGGDFDFRVGFVEAGT --- 103  
Xl p53 1 -MEPSSETGMDDPLSQETFEDLWSLLPDP-----LQVTVCRLDNLSEFPDYPLAADMSVLQEGLMGNAVPTVTS-CAPSTDDYAGKYGLQLDFQQNGT --- 91  
Tc p53 1 -MSQQSQFSDIIPDVDFKLEDHG-----LKDDVGRIMHENNVHLVNDDGEEEEKYSNEANYTESIFPPDQP-TNLGTEEYPGPFNFVLSVISPNI --- 85  
Dm p53 1 --MYISQPMWHKESDSEDDSTEVDIKEDIP-----KTVEVSGSELTTEPMAFLQGLNSGNLMQFSQQSVLREMMLQDIQIQANT-LPKLENHNI GGYCFSMVLDEP-----100  
Sm p53 1 -MAQQYITSAFDPNFTTLQHQTSHYKSSP-----IEMI VPMQCNQNAATLSITPVHISPFVNI SDSNNHNL TN I VEPVSSNTMSPAFKSDDMPTLSSYPGPYNFQIFIPNGEFDDES 111

Hs p53 119 -AKSVTCTYSPALNKMFCQLAKTCPVQLWVDS TPP-----PGTRVRAMA I YKQSQHMTEVVRCPHHERCSDS-DGLAPP---QHLIRVEGNLRVEYLDDR---NTFRHSVVVPYEP----P 223  
Dl p53 112 -AKSVTCTYSPALNKLFCQLAKTCPVQLWVSSPPP-----PGTRVRAMA I YKKSEYMTEVVRCPHHERCSDYSDGLAPP---QHLIRVEGNLRAEYLDDR---NTFRHSVVVPYEP----P 217  
Gg p53 104 -AKSVTCTYSPVLNKVYCR LAKPCPVQVRVGVAPP-----PGSSLRAVAVYKKEHVAEVVRCPHHERCGGTDGLAPA---QHLIRVEGNPQARYHDDE---TTKRHSVVVPYEP----P 209  
Xl p53 92 -AKSVTCTYSPENLKLFCQLAKTCP LLVRVESP PP-----RGSILRATAVYKKEHVAEVVKRCPHHERSVEPEGEDAAPP---SHLMRVEGNLQAYYMEDV---NSGRHSVCVPYEG----P 197  
Tc p53 86 -EQKSPWEYSEKLNKIFIGINVKFPAFVSVQNRPNQ-----LPLYIRATPVFCQTQHFQDLVHRCVGRHPQDQSNKGVAPHIFQHII RCSNDSALYFGDKN---TGARLNI VLPLAH----P 195  
Dm p53 101 --PKSLWYSIPLNKLYIRMNKAFNV DVQFKSKMPI-----QPLNLRVFLCFSN--DVSAPVVRQNHLSVEPLTANNAKMR--ESLLRSENPNSVYCGNAQGGKISERFSVVVPLNMSRSVT 212  
Sm p53 112 KRKGQTCVFQTDKMGNHQLFTKPHPHYWRLNYSADPSMSTENMYIRMV PVFGDPEKAQCILERCAKHKEVTTDENHWKYR---SMLIVEKTCAYHFQDSA---TKRVCILLPFEK----H 221

Hs p53 224 EVGSDCTTIHYNMCMSSCMGG--MNR RPILTITILE-----DSSGNLLGRNSFEVVRVCACPGDRDRTE-----EENLRKKGEPHH-----ELPPGSTKRALPNNTSSSPQPKK 320  
Dl p53 218 EVGSDCTTIHYNMCMSSCMGG--MNR RPILTITILE-----DSNGNLLGRNSFEVVRVCACPGDRDRTE-----EENFHKKGQSCP-----ELPTGSAKRALPTGTSSSPQPKK 314  
Gg p53 210 EVGSDCTTVLYNFMCMSSCMGG--MNR RPILTITILE-----GPGGQLLGRRCFEVVRVCACPGDRDRKIE-----EENFRKRGG-----AGGVAKRAMSPTEAPEPKK 301  
Xl p53 198 QVGTECTTVLYNFMCMSSCMGG--MNR RPILTITILE-----TPQGLLLGRRCFEVVRVCACPGDRDRTE-----EDNYTKKRGLK-----PSGKRELAHPPSSEPPLPKK 291  
Tc p53 196 QVGEDVVKEFFQFVCKNSCPLG--MNR RPIDVVFTLE-----DNKGEVFGRRLVGVRVCSCPKRDKDKE-----EKDMESAVPPR-----RKKRKLGNDRRVPVQG- 285  
Dm p53 213 RSGLTRQTLAFKFCVQNSCIG----RKETS LVFCL E-----KACGDIVGQHV IHVKICTCPKRDR IQD-----ERQLNSKKRKS VPEAAE EDEPSKVRRCIAIKTEDTESNDS 311  
Sm p53 222 AEGE IYSSVNCQFACYN SCFNQDSGGRKTLYL IITLEFLDKKTNKFDWGRQCLQFRSCACPSRDWRDKIKGDPEMLLKFKEKR IKTEEKLNNLVISKSVPINMGGKDAIRVLP LPLGLD 343

Hs p53 321 KPLDG--EYFTLQIRG--RERFEMFRELNEALELKDAQAGKEP GGSRAHSSHLKSKKGQSTSRHKKLMFKTEGPDS-----393  
Dl p53 315 KPLDG--EYFTLQIRG--RERFEMFRELNEALELKDAQAGKEP GESRAHSSHLKSKKGQSPSRHKKLMFKREGPDS-----387  
Gg p53 302 RVLNPDNEIFYLQVRG--RRRYEMLKEINEALQAE GGSAPRPSKG-----RRVKVEGPQSPCGKLL LQKGS-----367  
Xl p53 292 LVVDDDEEIFTLRIG--RSRYEMIKKLNDALELQESLDQK-----VTIKCRKCRDEIKPKKGKLLVKDEQPDSE-----361  
Tc p53 286 ---SSDNKIFALNIHI--PGKKNYLQALKMCQDMLANEILKKQE QGGDSDADKNKYNEITVLLNGTAAFD-----350  
Dm p53 312 RDCDDSAAEWNVSRTP--DGDYRLAITCPNKEWLQSIEGMIKEAAEVL RNPQENLRRHANKLLSLKRAYELP-----385  
Sm p53 344 DAINALVCGYLLNRTTNSAIIAAFNQMKDVEHLIIDQFTSNLDQNTCDSSKSPSQTPESEQISPNTSNLQFNDYGS LYGEP CQPYRPMHQVVNNFSSPGIFSKIPFETYPVSYDIKLSHEMP 465

Hs p53 -----  
Dl p53 -----  
Gg p53 -----  
Xl p53 -----  
Tc p53 -----  
Dm p53 -----  
Sm p53 466 QHFDELPSDNYNRH 479
