# Supplementary material for: A planarian p53 homolog regulates proliferation and self-renewal in adult stem cell lineages
Source: Oxford University Press journal article supplement (doi:10.1242/dev.044297), 2009-12-29
Supplement: dev044297-sup-044297-figs5.pdf [file dev044297-sup-044297-figs5.pdf]

|                                    |                                                          | <i>Control(RNAi)</i>                                                                 | <i>Smed-p53(RNAi)</i>                                                                 |
|------------------------------------|----------------------------------------------------------|--------------------------------------------------------------------------------------|---------------------------------------------------------------------------------------|
| Tail fragments regenerating a head | Day 3 Blastemas<br>Stem Cells<br><i>smedwi-1</i>         |    |    |
|                                    | Day 3 Blastemas<br>Early Progeny<br><i>Smed-NB21.11e</i> |   |   |
| Intact Animals                     | Day 3<br>Early Progeny<br><i>Smed-NB32.1g</i>            |  |  |
|                                    | Day 15<br>Late Progeny<br><i>Smed-H45.8g</i>             |  |  |
