# Supplementary material for: A planarian p53 homolog regulates proliferation and self-renewal in adult stem cell lineages
Source: Oxford University Press journal article supplement (doi:10.1242/dev.044297), 2009-12-29
Supplement: dev044297tables1.pdf [file dev044297tables1.pdf]

**Table S1. p53 binding partner conservation in vertebrates versus planarians versus *Drosophila***

| Gene (vertebrates) | Planarian orthologs (number)? | TBLASTN: mouse to planarian | Fly orthologs (number)? | BLASTP: mouse to fly |
|--------------------|-------------------------------|-----------------------------|-------------------------|----------------------|
| Brca1              | Maybe                         | $10^{-5}$                   | No                      | NA                   |
| Brca2              | Yes                           | $10^{-11}$                  | No                      | NA                   |
| DNAPK              | Yes                           | $10^{-28}$                  | No                      | NA                   |
| MDM2               | None                          | NA                          | None                    | NA                   |
| MDM4               | None                          | NA                          | None                    | NA                   |
| 53bp1              | None                          | NA                          | None                    | NA                   |
| 53bp2              | Yes (2×)                      | $10^{-28}, 10^{-39}$        | Yes                     | $10^{-80}$           |
| ATM                | Yes                           | $10^{-34}$                  | Yes                     | $10^{-134}$          |
| ATR                | Yes                           | $10^{-34}$                  | Yes                     | 0.0                  |
| Chk1               | Yes                           | $10^{-36}$                  | Yes                     | $10^{-122}$          |
| Chk2               | Yes                           | $10^{-44}$                  | Yes                     | $10^{-87}$           |
| Bcl-2/Bcl-xL       | Yes (10×)                     | $\sim 10^{-12}$             | Yes (2×)                | $10^{-10}, 10^{-8}$  |
| CyclinB1           | Yes                           | $10^{-19}$                  | Yes                     | $10^{-66}$           |
| Dp-1               | Yes                           | $10^{-23}$                  | Yes                     | $10^{-76}$           |
| E2F-1              | Yes                           | $10^{-37}$                  | Yes                     | $10^{-34}$           |
| HDAC1              | Yes                           | $10^{-176}$                 | Yes                     | 0.0                  |
| Nucleostemin       | Yes                           | $10^{-39}$                  | Yes                     | $10^{-71}$           |
| PTEN               | Yes (2×)                      | $10^{-19}, 10^{-16}$        | Yes                     | $10^{-78}$           |
| Rad51              | Yes                           | $10^{-137}$                 | Yes                     | $10^{-127}$          |
| Rb1                | Yes                           | $10^{-46}$                  | Yes (2×)                | $10^{-87}, 10^{-30}$ |
| Sirt1              | Yes                           | $10^{-88}$                  | Yes                     | $10^{-118}$          |

Listed in the first column are a few of the best-known proteins that have been reported to bind to vertebrate p53. Columns two and four list whether or not each homolog exists in planarians or *Drosophila*, respectively. Columns three and five are the corresponding BLAST e-values when BLASTing the mouse sequence to either the translated planarian genome, or the protein annotations in flies, respectively. Note that protein BLASTs to a translated genome (TBLASTN) are expected to yield much lower BLAST scores owing to intron gaps, and thus are only weakly comparable to the BLASTP scores from flies. There are three genes (in blue) where the planarian gene complement is closer to that of vertebrates (not found in flies). Three genes (in red) are found in vertebrates but not shared by either planarians nor flies. The remaining genes (in black) are shared in all three groups, although most have not been tested to interact with invertebrate p53 homologs owing to the lack of tumor suppressor function of p53 in *Drosophila* and *C. elegans*.

NA, not applicable.
