# Supplementary figures and images for: A planarian p53 homolog regulates proliferation and self-renewal in adult stem cell lineages
Source: Oxford University Press journal article supplement (doi:10.1242/dev.044297), 2009-12-29

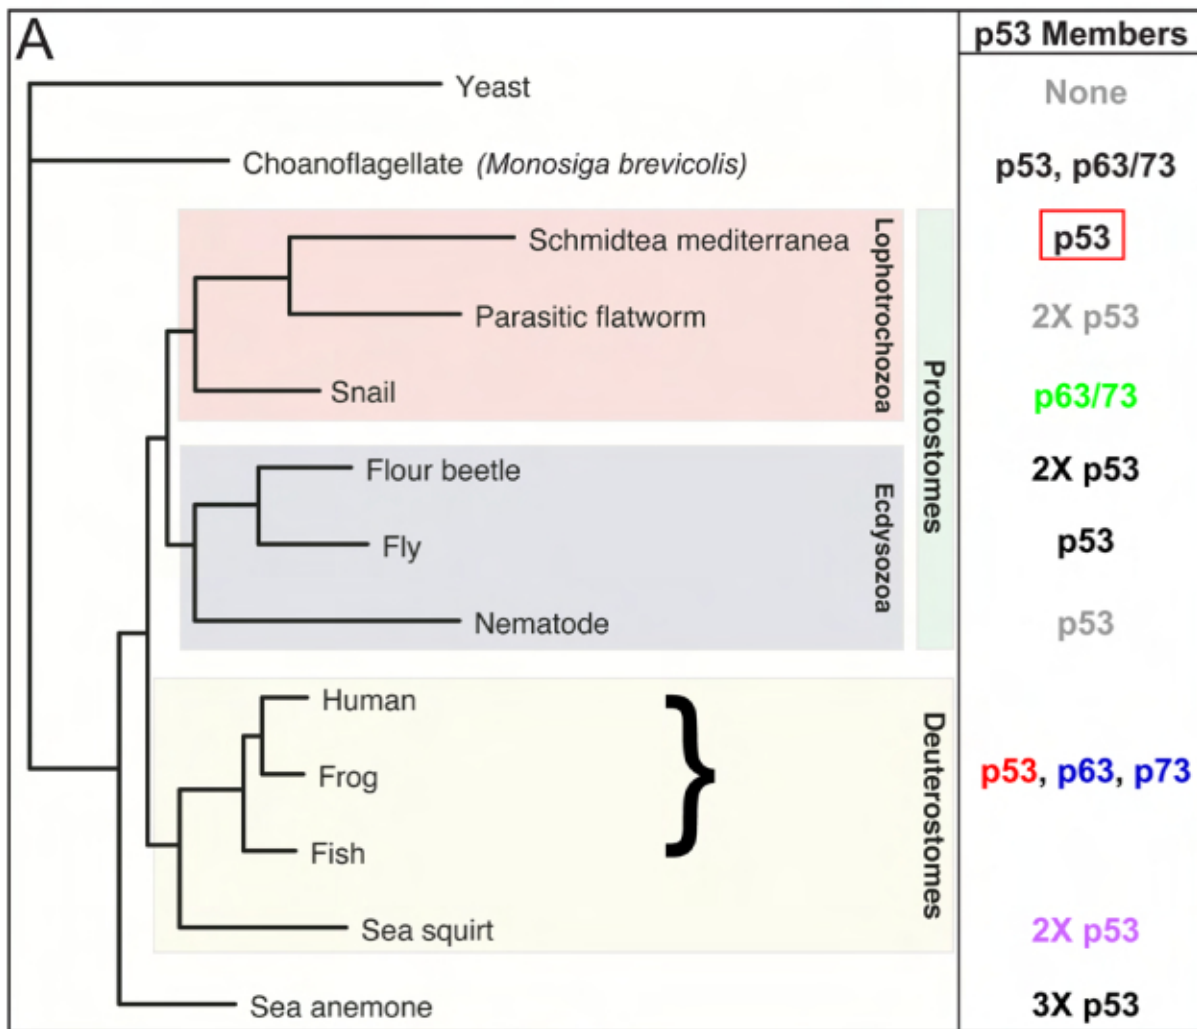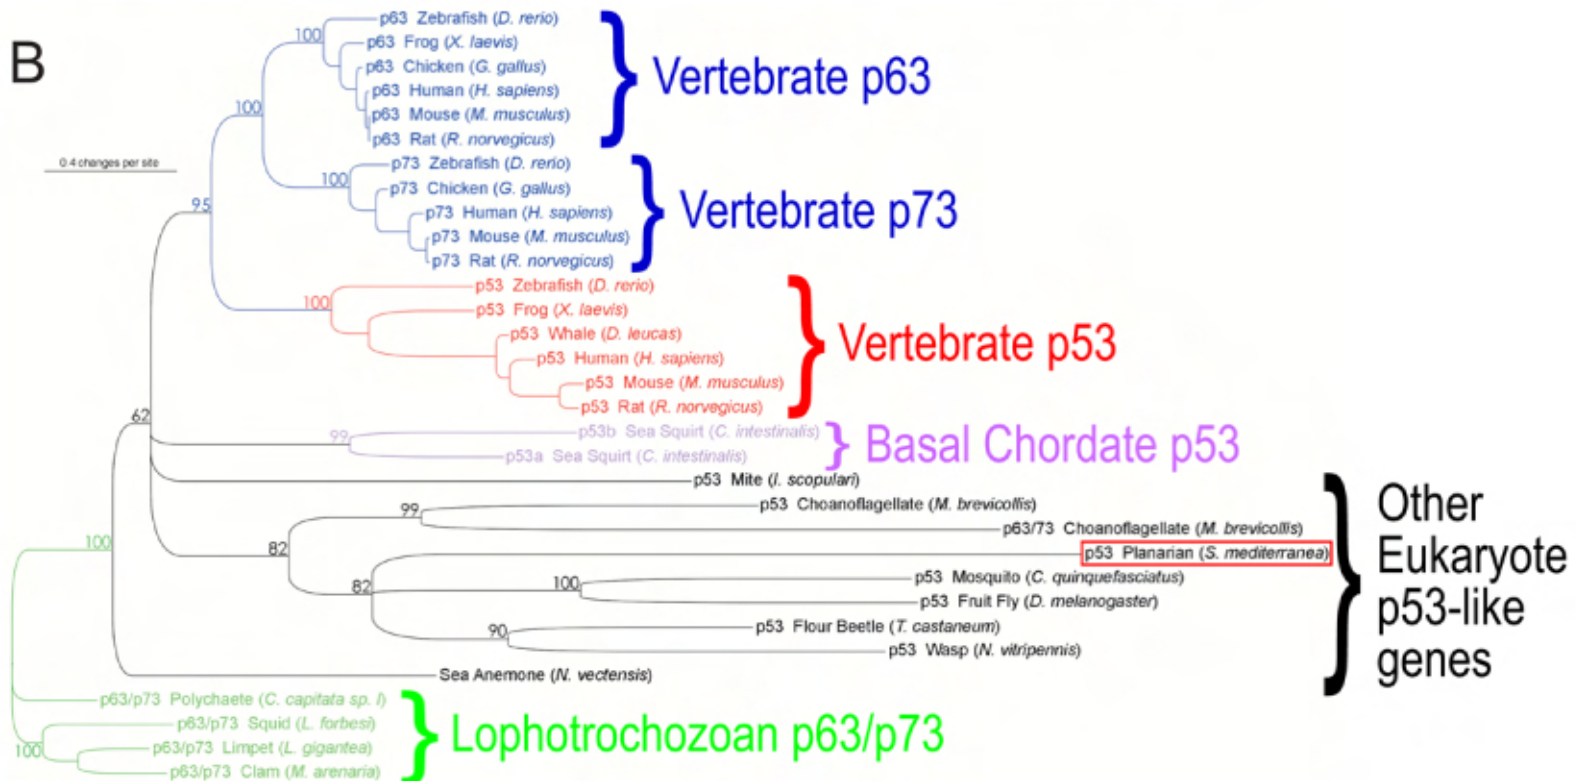

Supplement: dev044297-sup-044297-figs1.pdf [file dev044297-sup-044297-figs1.pdf]

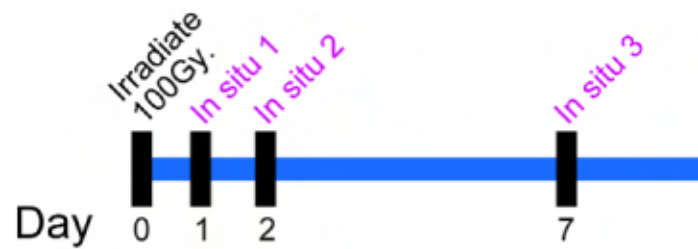

*Smed-p53* WT

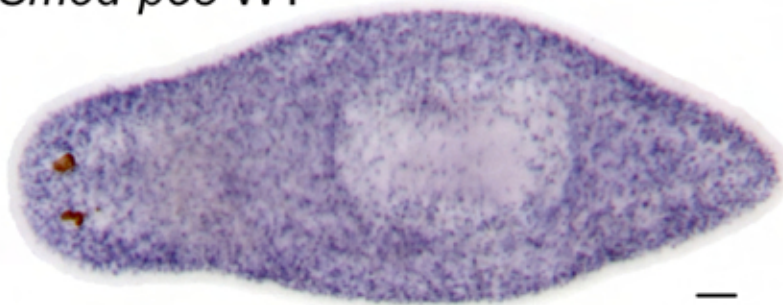

*Smed-p53* 100Gy. 24hrs

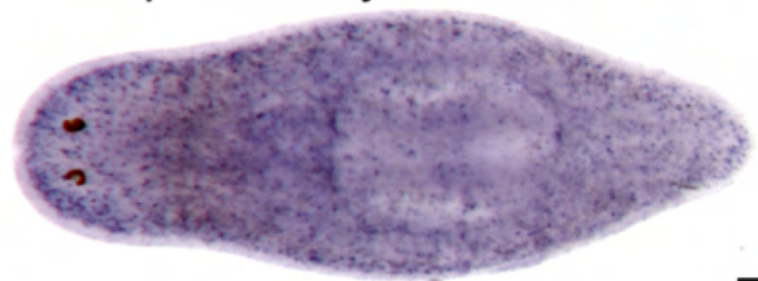

*Smed-p53* 100Gy. 48hrs

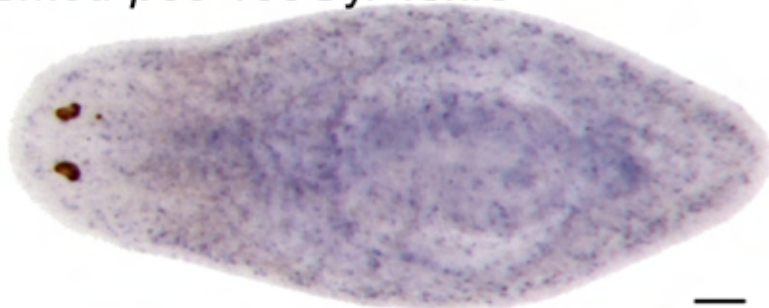

*Smed-p53* 100Gy. 7 Days

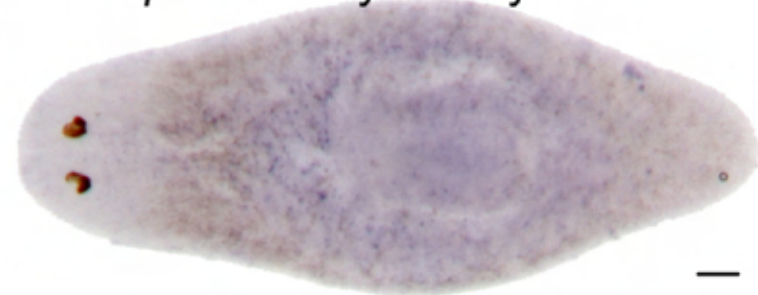

Supplement: dev044297-sup-044297-figs3.pdf [file dev044297-sup-044297-figs3.pdf]

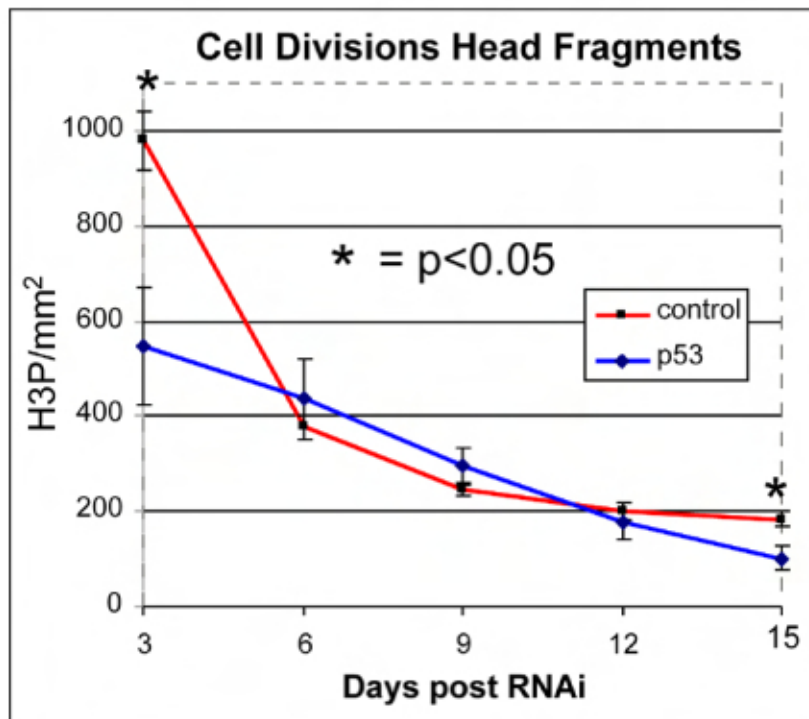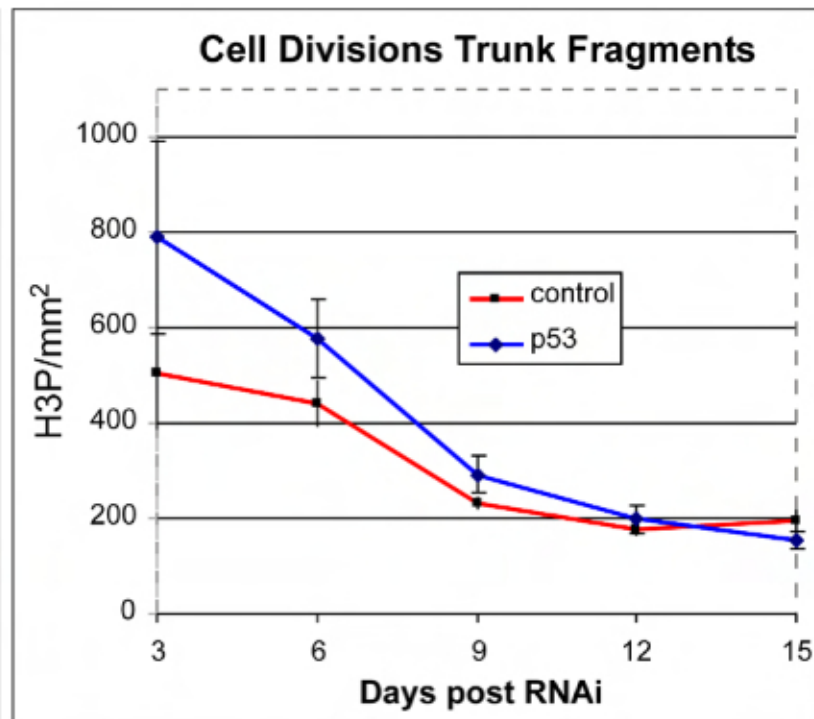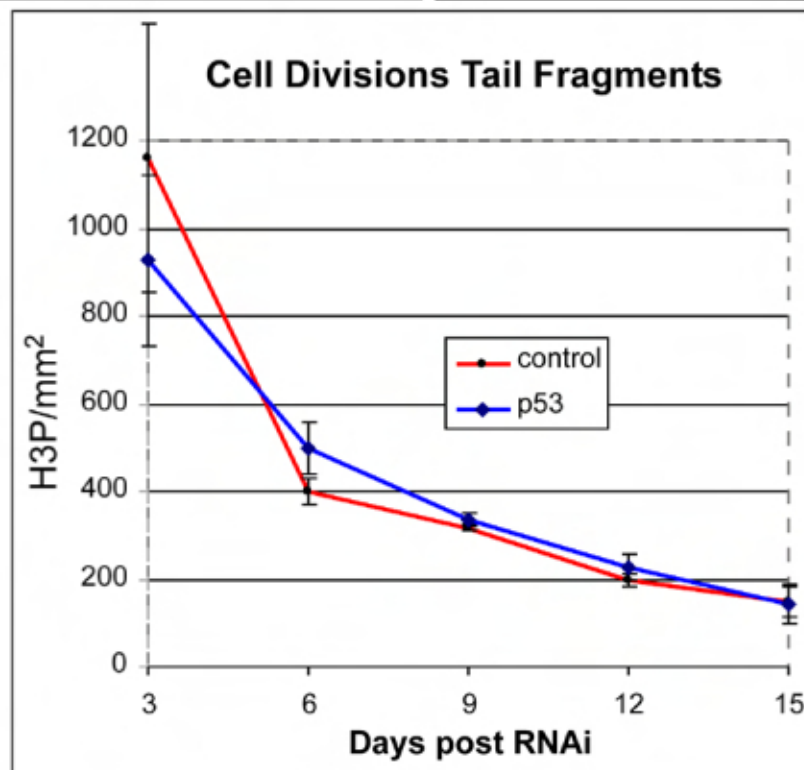

Supplement: dev044297-sup-044297-figs4.pdf [file dev044297-sup-044297-figs4.pdf]

## Cell Death Intact Worms

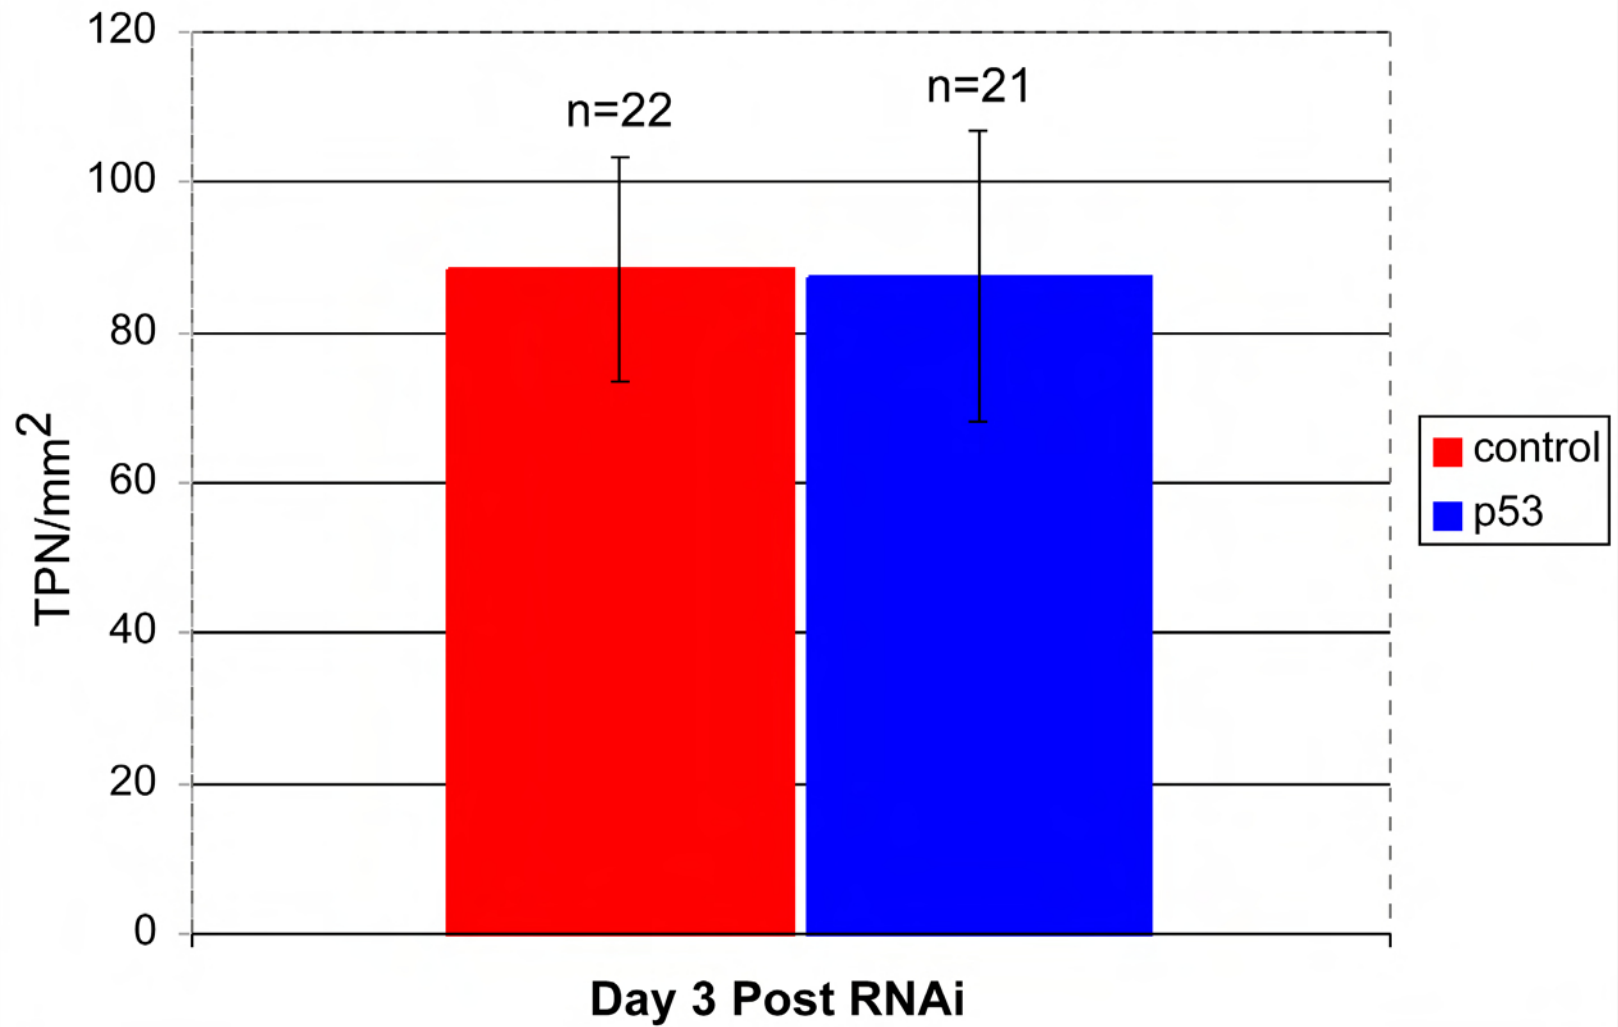

Supplement: dev044297-sup-044297-figs6.pdf [file dev044297-sup-044297-figs6.pdf]

Control(RNAi), Day 15

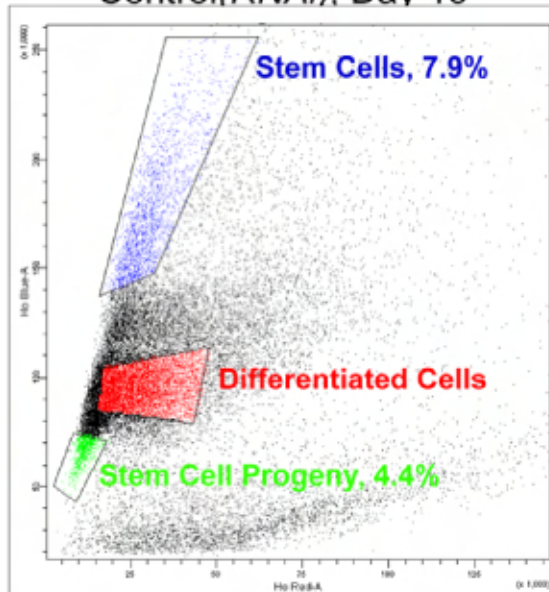

WT 60Gy., Day 15

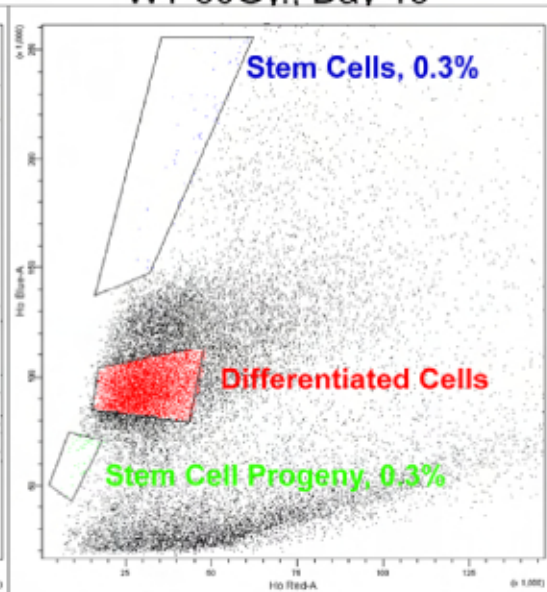

*Smed-p53*(RNAi), Day 15

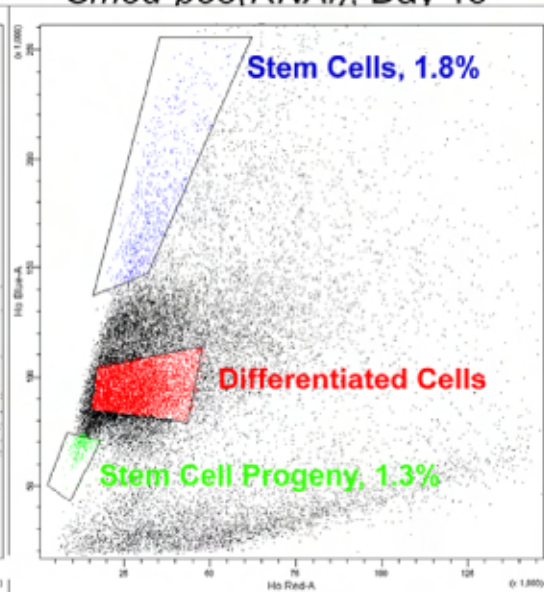

Supplement: dev044297-sup-044297-figs7.pdf [file dev044297-sup-044297-figs7.pdf]

1 Feed, Various Irradiation Doses

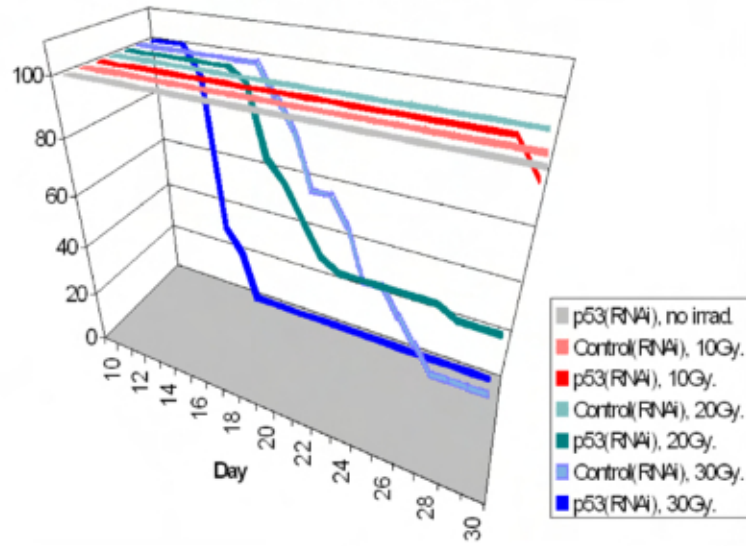

1 Feed, 20Gy. Irradiation

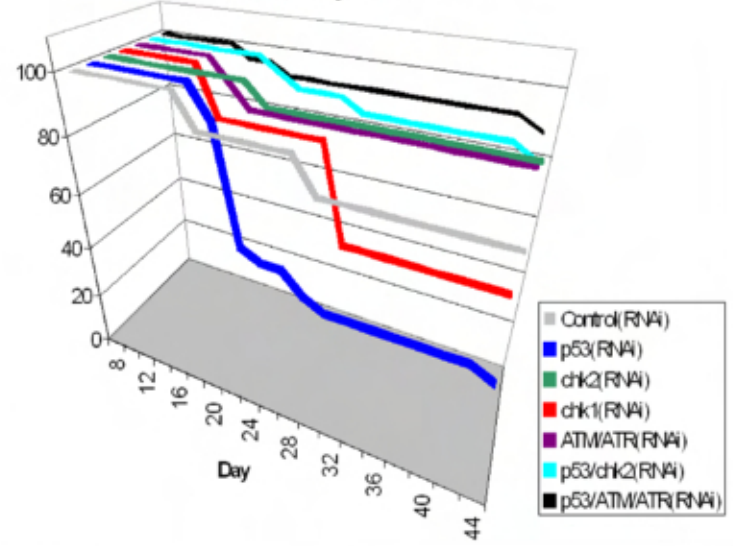

2 Feeds, 30Gy. Irradiation

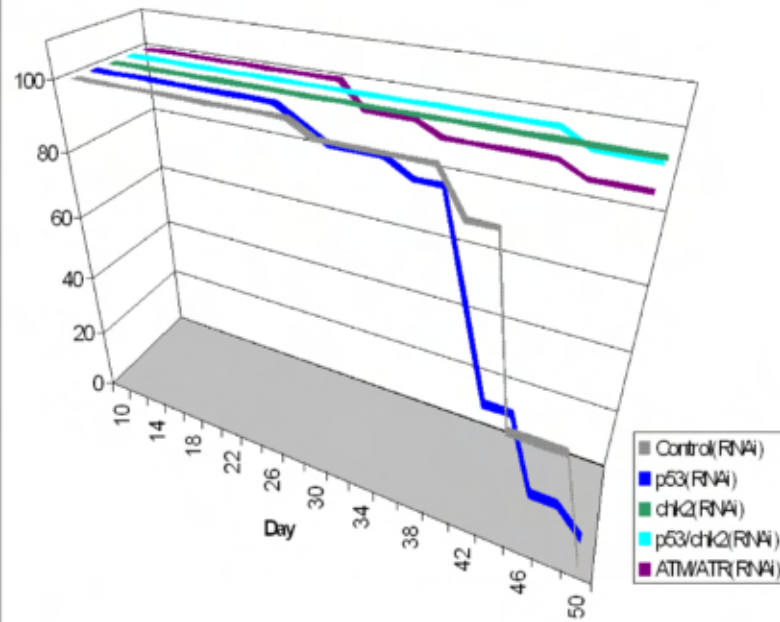

Supplement: dev044297-sup-044297-figs8.pdf [file dev044297-sup-044297-figs8.pdf]
